# Supplementary material
Source: publisher figshare collection journal article supplement (https://tandf.figshare.com/ndownloader/files/18205952)
Supplement: Supplementary file 1 [file 18205952]

| **Primer** | **Sequence (5’-3’)** | **Application** |
| --- | --- | --- |
| GmPSKγ1 F | GCGTCCATGGCAAGGTGCAT | Cloning the full-length or truncated *GmPSKγ1* CDS |
| GmPSKγ1 R | AGCGGATCCTCAAGGCCCATTAT |
| GmPSKγ1 Rtc | CGAGGATCCTCACGTATGAGCAACCATTG |
| GmPSKγ1 qF | ATGGCAAGGTGCATCACAATAG | qRT-PCR |
| GmPSKγ1 qR | CCGTGTCTTTTCAAGTGACAT |
| AtActin2 qF | TTCTTCTTACCGAGGCTCCTC |
| AtActin2 qR | GAATCCAGCACAATACCGGTTG |
| AtFRK1 qF | GATGGCGGACTTCGGGTTATC |
| AtFRK1 qR | CGAATAGTACTCGGGGTCAAG |
| AtChitinase qF | TAGGAAGATCAATGGTGGTG |
| AtChitinase qR | AACCGTGTCATACGAACCAC |

Table S1 List of primers used in this study.

Restriction sites in the primers for cloning are underlined.
